# Supplementary material for: Isolation and structure determination of a tetrameric sulfonyl dilithio methandiide in solution based on crystal structure analysis and 6Li/13C NMR spectroscopic data
Source: publisher site journal article supplement (doi:10.3762/bjoc.16.172), 2020-08-21
Supplement: Additional file 1 [file 1860-5397-16-172-S1.pdf]

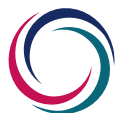

## Supporting Information

for

### **Isolation and structure determination of a tetrameric sulfonyl dilithio methandiide in solution based on crystal structure analysis and $^6\text{Li}/^{13}\text{C}$ NMR spectroscopic data**

Jürgen Vollhardt, Hans Jörg Lindner and Hans-Joachim Gais

*Beilstein J. Org. Chem.* **2020**, *16*, 2057–2063. [doi:10.3762/bjoc.16.172](https://doi.org/10.3762/bjoc.16.172)

### **Experimental details, crystal data, and parameters of data collection for tetramer $(2a)_4 \cdot (\text{THF})_6$**

## Table of contents

|                                                                                                         |    |
|---------------------------------------------------------------------------------------------------------|----|
| 1. Isolation of single crystals of <b>(2a)</b> <sub>4</sub> (THF) <sub>6</sub> .....                    | S2 |
| 2. Crystal data and parameters of data collection for <b>(2a)</b> <sub>4</sub> (THF) <sub>6</sub> ..... | S3 |

## 1. Isolation of single crystals of $(\mathbf{2a})_4(\text{THF})_6$

*General:* All experiments were carried out by using Schlenk and syringe techniques in flame-dried glassware under argon. THF and *n*-hexane were purified by distillation from potassium benzophenone ketyl.  $\text{Li}_2\text{O}$ -free *n*-BuLi was prepared as follows. To *n*-BuLi (50.1 mL of 1.67 M in *n*-hexane) was added at room temperature MeI (0.30 mL, 4.85 mmol). The mixture became turbid after a few seconds. Then, a colorless solid deposited and the initial yellow color disappeared. After the mixture was kept for 24 h at room temperature, the clear and nearly colorless supernatant was removed by a syringe. Titration of an aliquot with  $(\text{Ph})_2\text{CHCO}_2\text{H}$  showed a 1.33 M solution of *n*-BuLi.

*Experimental:* To a solution of sulfone **4** (225 mg, 0.987 mmol) in a mixture of THF (2.50 mL) and *n*-hexane (0.60 mL) was added at  $-90\text{ }^\circ\text{C}$   $\text{Li}_2\text{O}$ -free *n*-BuLi (1.40 mL of 1.33 M in *n*-hexane). The flask was closed, the cooling bath removed, and the mixture warmed without vibration to  $22\text{ }^\circ\text{C}$  (air bath). After 20 min, thirty to forty clear, strongly refractive octahedral crystals of  $(\mathbf{2a})_4(\text{THF})_6$  had formed. Most of the crystals developed cracks from the outside to the inner side. Crystallization was interrupted by replacement of the mother liquor by a mixture of *n*-hexane and THF (10 mL, 30:1). Then, an intact crystal was transferred to a Mark tube, which was sealed with a burner.

## 2. Crystal data and parameters of data collection for (2a)<sub>4</sub>·(THF)<sub>6</sub>

A crystal of 0.22 × 0.30 × 0.35 mm was found to be suitable for single crystal X-ray structure determination. A total number of 5736 reflections (including 3075 with  $I > 2\sigma(I)$ ) were collected in the  $\omega/2\theta$  mode at 293 K employing MoK $\alpha$  radiation ( $\lambda = 0.71073$  Å) within the limits of  $\Theta_{\min} = 4.91$  and  $\Theta_{\max} = 23.08^\circ$ . Cell dimensions of  $a = 21.287(9)$  Å,  $b = 18.734(8)$  Å, and  $c = 20.928(9)$  Å result in a cell volume of 8346(6) Å<sup>3</sup> and a calculated density of 1.166 g cm<sup>-3</sup>. The absorption coefficient was found to be 0.226 mm<sup>-1</sup>, no absorption correction.  $T_{\min} = 0.924$ ,  $T_{\max} = 0.951$ . The tetramer crystallizes in orthorhombic space group *Pbcn*(60). The structure was both solved by direct methods and refined employing the SHELXS-97 suite of crystallographic routines. Refinement of 485 parameters against  $F^2$  including all reflections resulted in a R-factor of  $w_r = 0.2537$  and an error of fit of 1.032. The residual electron density at this point was 0.571/−0.385. Refinement against  $F$  resulted in R-factors of 0.1653 (including all reflections, where negative  $F$  were set to zero) and of 0.069 including only those with  $F^2 > 2\sigma(F^2)$ . Part of the hydrogen positions could be located in Fourier difference maps where the remaining ones were calculated in idealized positions.

The tetramer (2a)<sub>4</sub>·(THF)<sub>6</sub> sits on a crystallographic  $C_2$  axis with a number of disorders. The methyl groups of a trimethylsilyl group are represented by two sets of C atoms each with occupancy of 0.5. Li4 is not exactly located on the  $C_2$  axis. It is resolved by two Li4 in general positions near the  $C_2$  axis each with an occupancy of 0.5. The THF molecule E is statistically distributed between two positions each with an occupancy of 0.5. The O atom was refined and the positions of the C atoms were obtained through Fourier synthesis. All H atoms except those in disordered areas were positioned following geometrical arguments. All atoms except H and Li4 and the C atoms of the THF molecule E were anisotropically refined.
